# Supplementary material for: Detection of cyberhate speech towards female sport in the Arabic Xsphere
Source: PeerJ journal article supplement (doi:10.7717/peerj-cs.2138), 2024-06-27
Supplement: Appendix_A.pdf [file Appendix_A.pdf]

*Appendix A: Participants Demographics*

| <b>Participants ID</b> | <b>Group</b> | <b>Participants Nationality</b> | <b>Participants Age</b> |
|------------------------|--------------|---------------------------------|-------------------------|
| 1                      | Sport Player | Saudi                           | 18-25                   |
| 2                      | Sport fan    | Saudi                           | 18-25                   |
| 3                      | Sport Player | Saudi                           | 18-25                   |
| 4                      | Sport Player | Saudi                           | 18-25                   |
| 5                      | Sport Player | Saudi                           | 26-30                   |
| 6                      | Sport Player | Saudi                           | 18-25                   |
| 7                      | Sport Player | Saudi                           | 31-36                   |
| 8                      | Sport fan    | Saudi                           | 18-25                   |
| 9                      | Sport Player | Saudi                           | 18-25                   |
| 10                     | Sport Player | Saudi                           | 18-25                   |
| 11                     | Sport Player | Saudi                           | 26-30                   |
| 12                     | Sport Player | Saudi                           | 18-25                   |
| 13                     | Sport Player | Saudi                           | 18-25                   |
| 14                     | Sport Player | Saudi                           | 18-25                   |
| 15                     | Sport Player | Saudi                           | 18-25                   |
| 16                     | Sport Player | Saudi                           | 18-25                   |
| 17                     | Sport fan    | Saudi                           | 37+                     |
| 18                     | Sport Player | Saudi                           | 18-25                   |
| 19                     | Sport Player | Saudi                           | 18-25                   |
| 20                     | Sport Player | Saudi                           | 18-25                   |
| 21                     | Sport Player | Saudi                           | 18-25                   |
| 22                     | Sport Player | Saudi                           | 26-30                   |
| 23                     | Sport Player | Saudi                           | 18-25                   |
| 24                     | Sport Player | Saudi                           | 18-25                   |
| 25                     | Sport Player | Saudi                           | 26-30                   |
| 26                     | Sport fan    | Saudi                           | 18-25                   |
| 27                     | Sport fan    | Saudi                           | 37+                     |
| 28                     | Sport Player | Saudi                           | 18-25                   |
| 29                     | Sport Player | Saudi                           | 18-25                   |
| 30                     | Sport Player | Saudi                           | 18-25                   |
| 31                     | Sport Player | Saudi                           | 26-30                   |
| 32                     | Sport fan    | Saudi                           | 18-25                   |
