# Supplementary material for: Detection of cyberhate speech towards female sport in the Arabic Xsphere
Source: PeerJ journal article supplement (doi:10.7717/peerj-cs.2138), 2024-06-27
Supplement: InterviewArabic.pdf [file InterviewArabic.pdf]

## بيانات المشاركة في الدراسة:

1. ما هو دورك الرياضي هل انتي لاعبه أو ممارسه للرياضة أو مشجعه ومتابعه للرياضه النسائيه ؟
2. اختيار عمرك من الخيارات التاليه :
  - 25-18
  - 30-26
  - 36-31
  - 37-وأكثر

## أسئلة المقابلة:

1. هل تستخدمين مواقع التواصل الاجتماعي للمشاركة أو متابعه ما يخص الرياضة النسائيه؟ إذا انعم ارجو ذكرها
2. ما هو نوع النشاط التي تمارسه عبر مواقع التواصل الاجتماعي؟
3. هل لاحظت أي اختلافات في طريقة معاملة الرياضيين الذكور عبر مواقع التواصل الاجتماعي تحديدا (تويتز) مقارنة بالرياضيين الإناث؟ إذا نعم اذكر بعض الأمثله؟
4. هل واجهت أي أنواع محددة من الكراهية أو المضايقات الإلكترونية التي تعتقد أنها تستهدفك كرياضية؟
5. إذا اجابتك بنعم اذكر مثال؟ وماهي أكثر الوسائل التي تتلقون فيها مضايقات بكثرة؟ وهل يوجد تفاعل مع أو ضد هذه المضايقات؟
6. هل يوجد فئة معينة تبت أي نوع كراهية لممارسة المراءة الرياضة أو متابعتها؟
7. هل أتر التعامل مع الكراهية عبر مواقع التواصل الاجتماعي تحديدا (تويتز) على صحتك العقلية أو رفاهيتك العامة أو حبك للرياضة؟ إذا نعم كيف كان التأثير؟
8. هل واجهت مشكلة مع والديك أو الأشخاص المقربين منك في تقبل أنك رياضية أو لديك اهتمامات رياضية؟ إذا إجابتك بنعم ما هو السبب؟
9. هل تعتقد أن هناك وعيا كافيا حول مخاطر الكراهية السيبرانية تجاه الرياضيات من النساء أو مشجعات الرياضة؟
10. هل تود مشاركة اي معلومة قد تساعدنا في البحث ؟
